# Supplementary material for: Retracted article: Recognition of d-fructose based on tetra-boronic functionalized viologen in aqueous solution
Source: Royal Society of Chemistry journal article supplement (doi:10.1039/c1ob05265a), 2011-01-01
Supplement: c1ob05265a.pdf [file c1ob05265a.pdf]

## Supporting information

### Specific Recognition of D-fructose Based on Tetra-Boronic Functionalized Viologen in Aqueous Solution

*Liheng Feng<sup>a\*</sup>, Fei Liang<sup>a</sup>, Yue Wang<sup>a</sup>, Guofeng Wang<sup>a</sup>, Xiaoju Wang<sup>b\*</sup>*

*<sup>a</sup>School of Chemistry and Chemical Engineering, Shanxi University, Taiyuan 030006, P.R. China*

*<sup>b</sup>Institute of Molecular Science, Chemical Biology and Molecular Engineering, Laboratory of Education Ministry, Shanxi University, Taiyuan, 030006, P.R. China*

#### Electronic Supplementary Information (ESI†)

1. The speculated binding way of ToBV and D-fructose Scheme *S1*
2. Fluorescent spectra of quenching and sensing for monosaccharides Fig. *S1* to Fig. *S8*
3. The <sup>1</sup>H NMR and <sup>13</sup>C NMR of compounds Fig. *S9* to Fig. *S12*

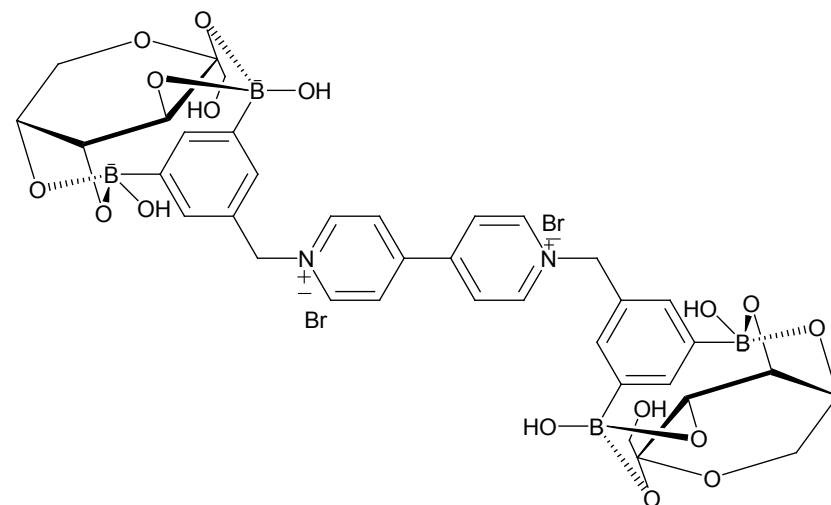

**Scheme. S1** The speculated binding way of ToBV and D-fructose.

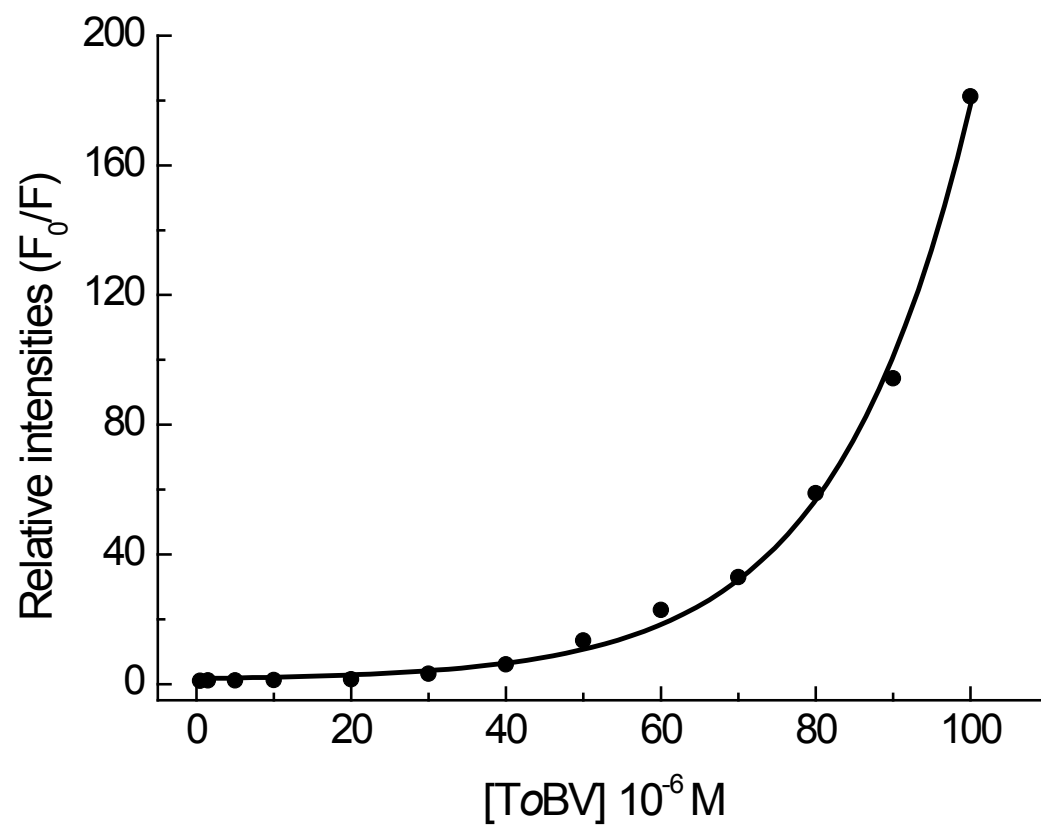

**Fig. S1** Stern-Volmer plot of HPTS ( $4.0 \times 10^{-6}$  M) quenching by ToBV, measured in phosphate buffer solution pH 7.4.

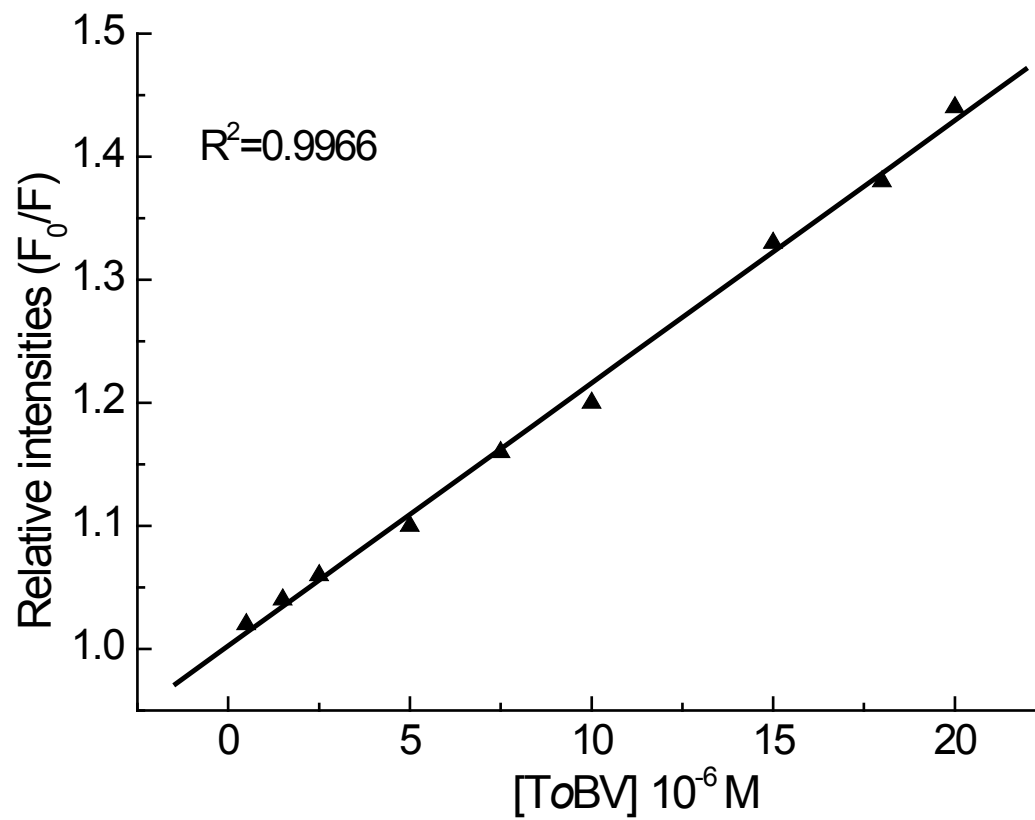

**Fig. S2** Stern-Volmer plot of HPTS ( $4.0 \times 10^{-6}$  M) quenching by lower concentration of ToBV, measured in phosphate buffer solution pH 7.4.

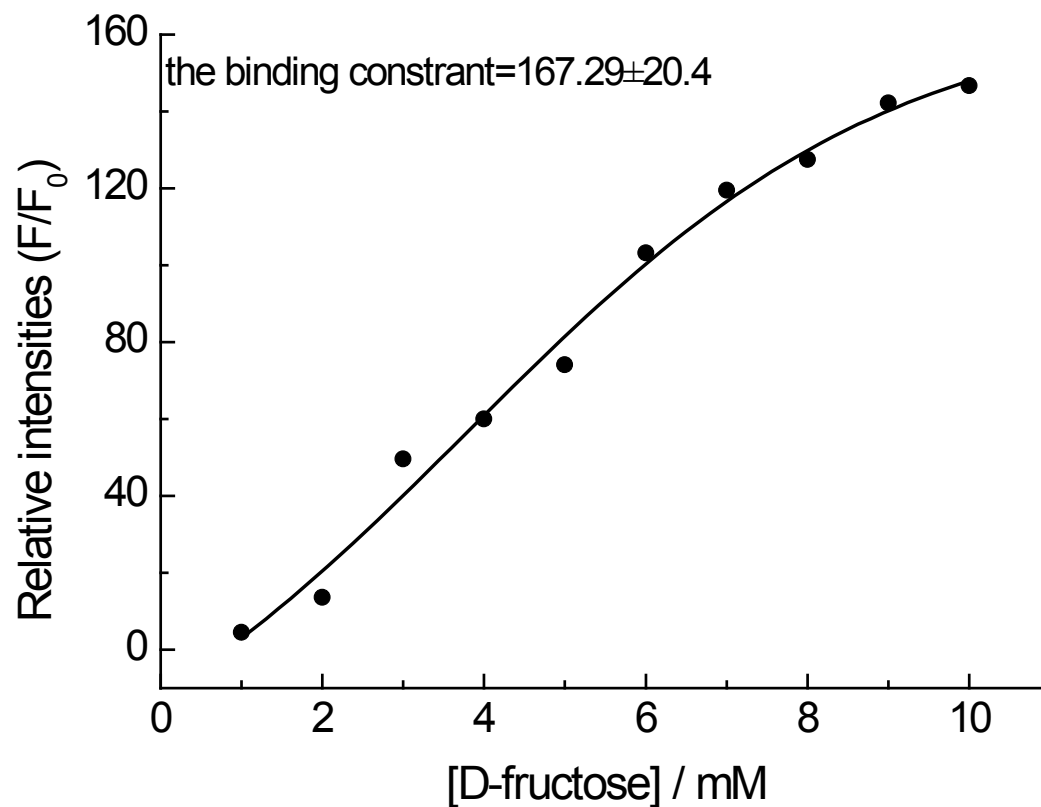

**Fig. S3** The superlinear relation response by introduction of quencher followed by D-fructose to HPTS solution ( $4.0 \times 10^{-6}$  M) at pH 7.4. The T<sub>0</sub>BV/HPTS ratio for this data was 150/1 and final D-fructose concentration was 10 mM.

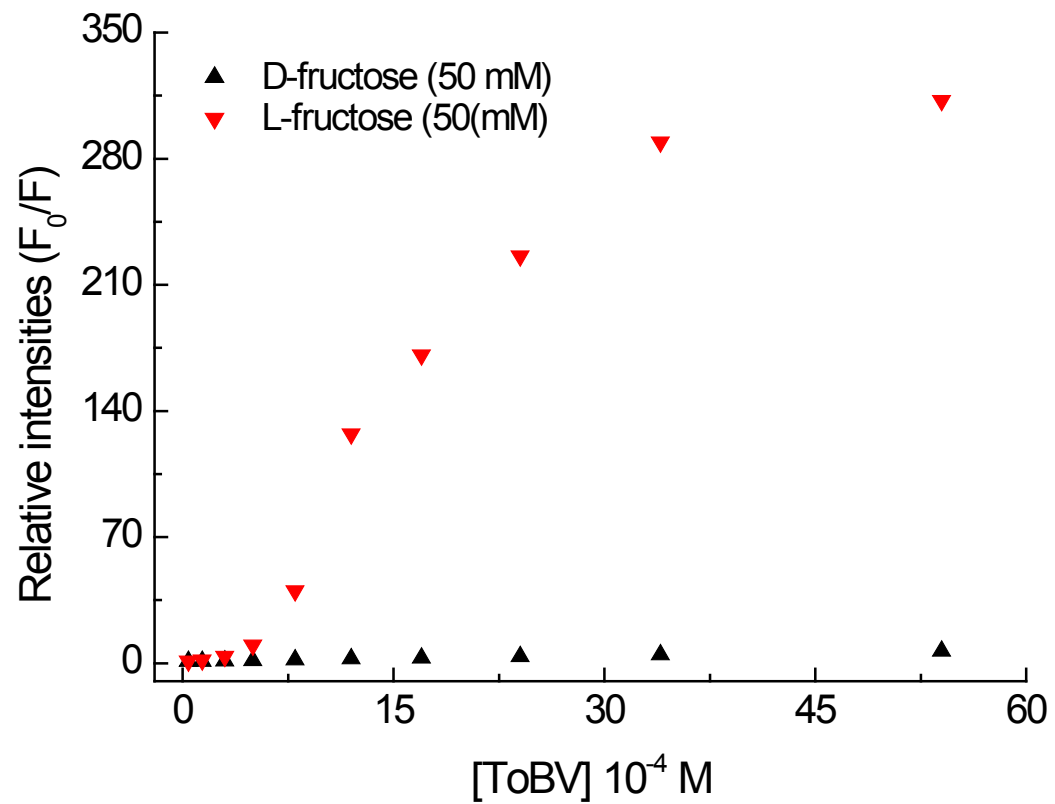

**Fig. S4** Stern-Volmer plots of HPTS ( $4.0 \times 10^{-6}$  M) quenching by ToBV in the presence of D-fructose and L-fructose (50 mM), respectively.

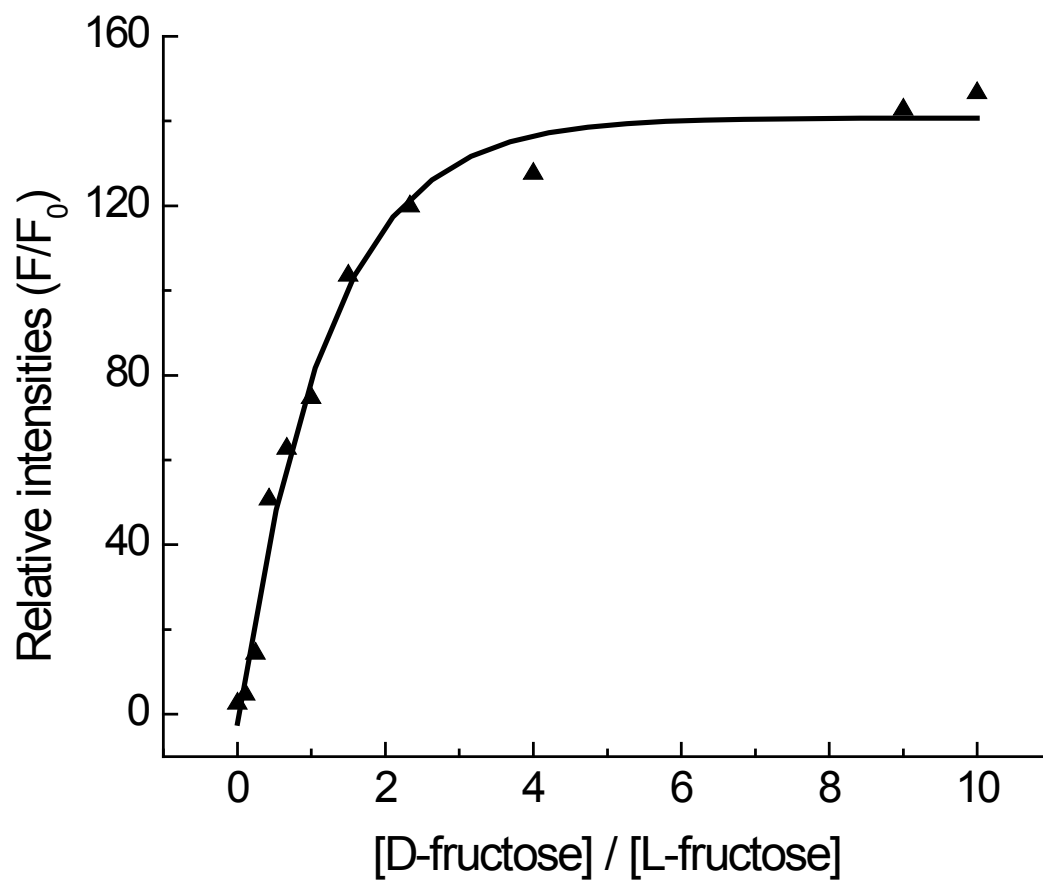

**Fig. S5** The ratios curve by introduction D/L-fructose to the sensing system with HPTS ( $4.0 \times 10^{-6}$  M) and ToBV ( $6.0 \times 10^{-4}$  M). The total concentration of D-fructose and L-fructose was 10 mM.

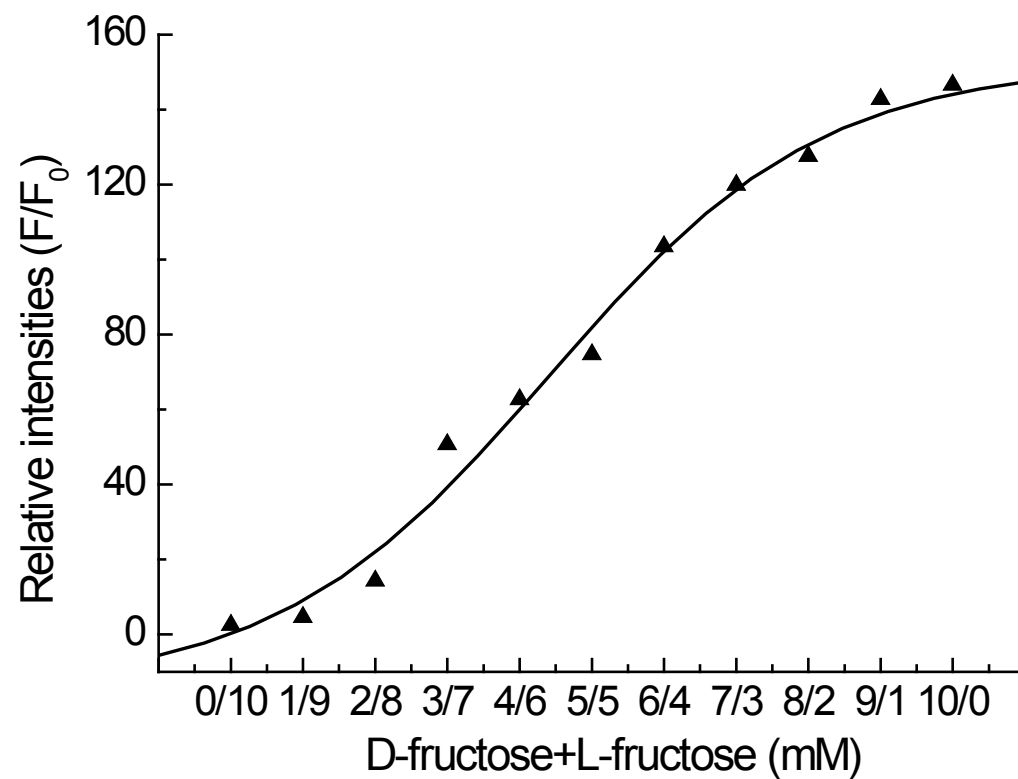

**Fig. S6** Characteristic fluorescence response by introduction D-fructose and L-fructose to the sensing system with HPTS ( $4.0 \times 10^{-6}$  M) and ToBV ( $6.0 \times 10^{-4}$  M). The total concentration of D-fructose and L-fructose was 10 mM.



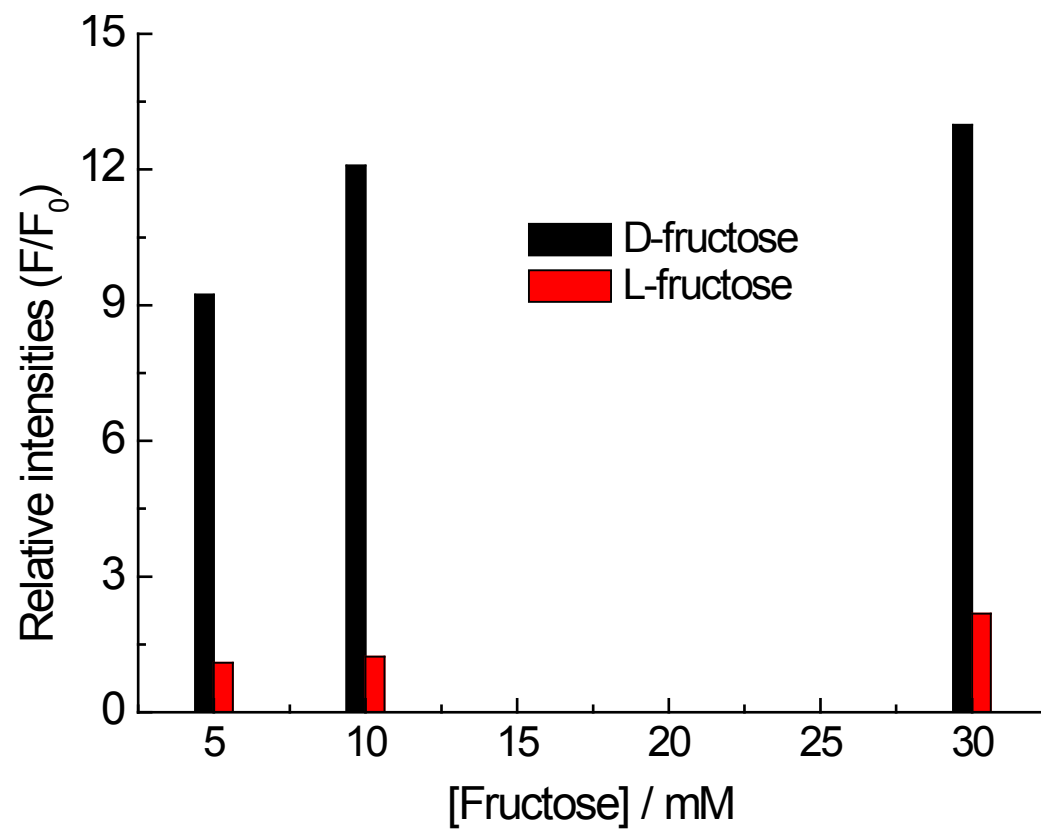

**Fig. S7** The binding characteristics of HPTS ( $4.0 \times 10^{-6}$  M) and ToBV ( $2.0 \times 10^{-4}$  M) with D-fructose and L-fructose in pH 7.4 phosphate buffer solutions.

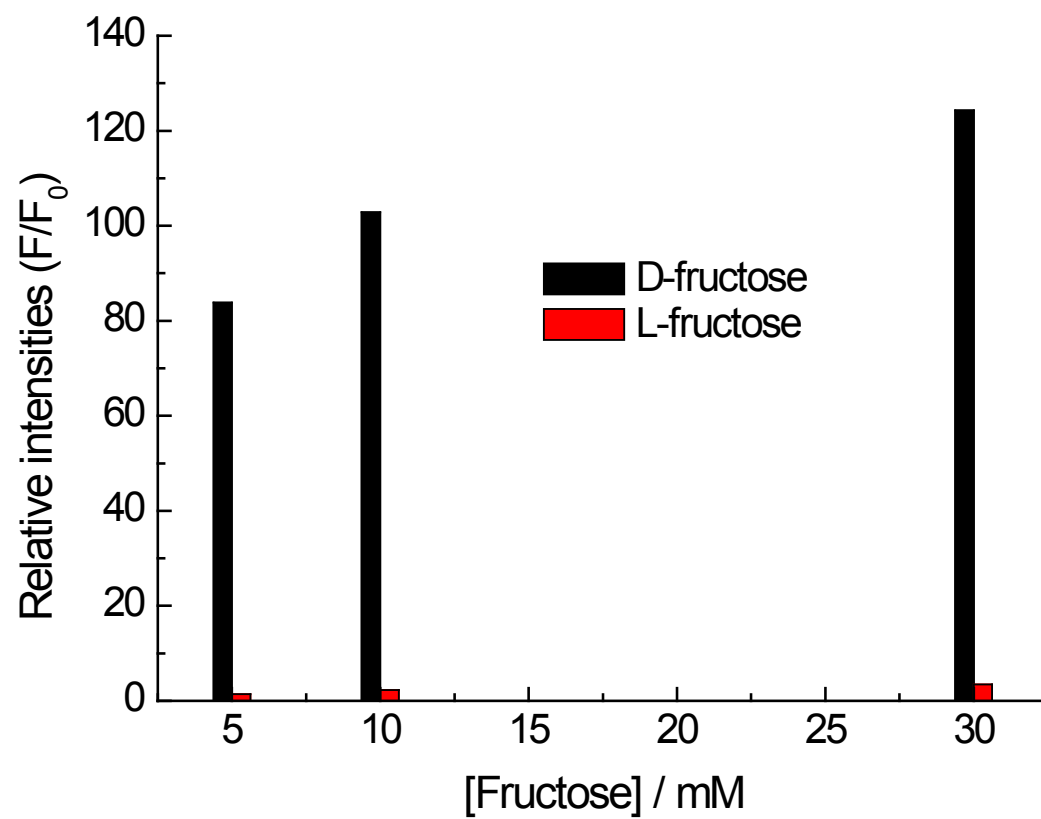

**Fig. S8** The binding characteristics of HPTS ( $4.0 \times 10^{-6}$  M) and ToBV ( $4.0 \times 10^{-4}$  M) with D-fructose and L-fructose in pH 7.4 phosphate buffer solutions.

NAME 0101  
EXPNO 378  
PROCNO 1  
Date\_ 20100112  
Time\_ 15.35  
NSTRUM spect  
PROBHD 5 mm PABBO BB-  
PULPROG zg30  
TD 65536  
SOLVENT CDCl3  
NS 8  
DS 2  
SWH 8223.685 Hz  
RDRES 0.125483 Hz  
AQ 3.9846387 sec  
RG 28.5  
DW 60.800 usec  
DE 6.50 usec  
TE 296.1 K  
D1 1.0000000 sec  
TD0 1

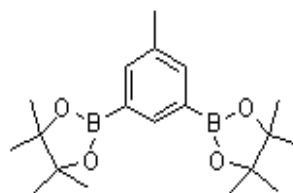

----- CHANNEL f1 -----  
NUC1 1H  
P1 13.40 usec  
PL1 0.00 dB  
PL1W 10.95182514 W  
SFO1 400.1324710 MHz  
SI 32768  
SF 400.1300127 MHz  
WDW EM  
SSB 0  
LB 0.30 Hz  
GB 0  
PC 1.00

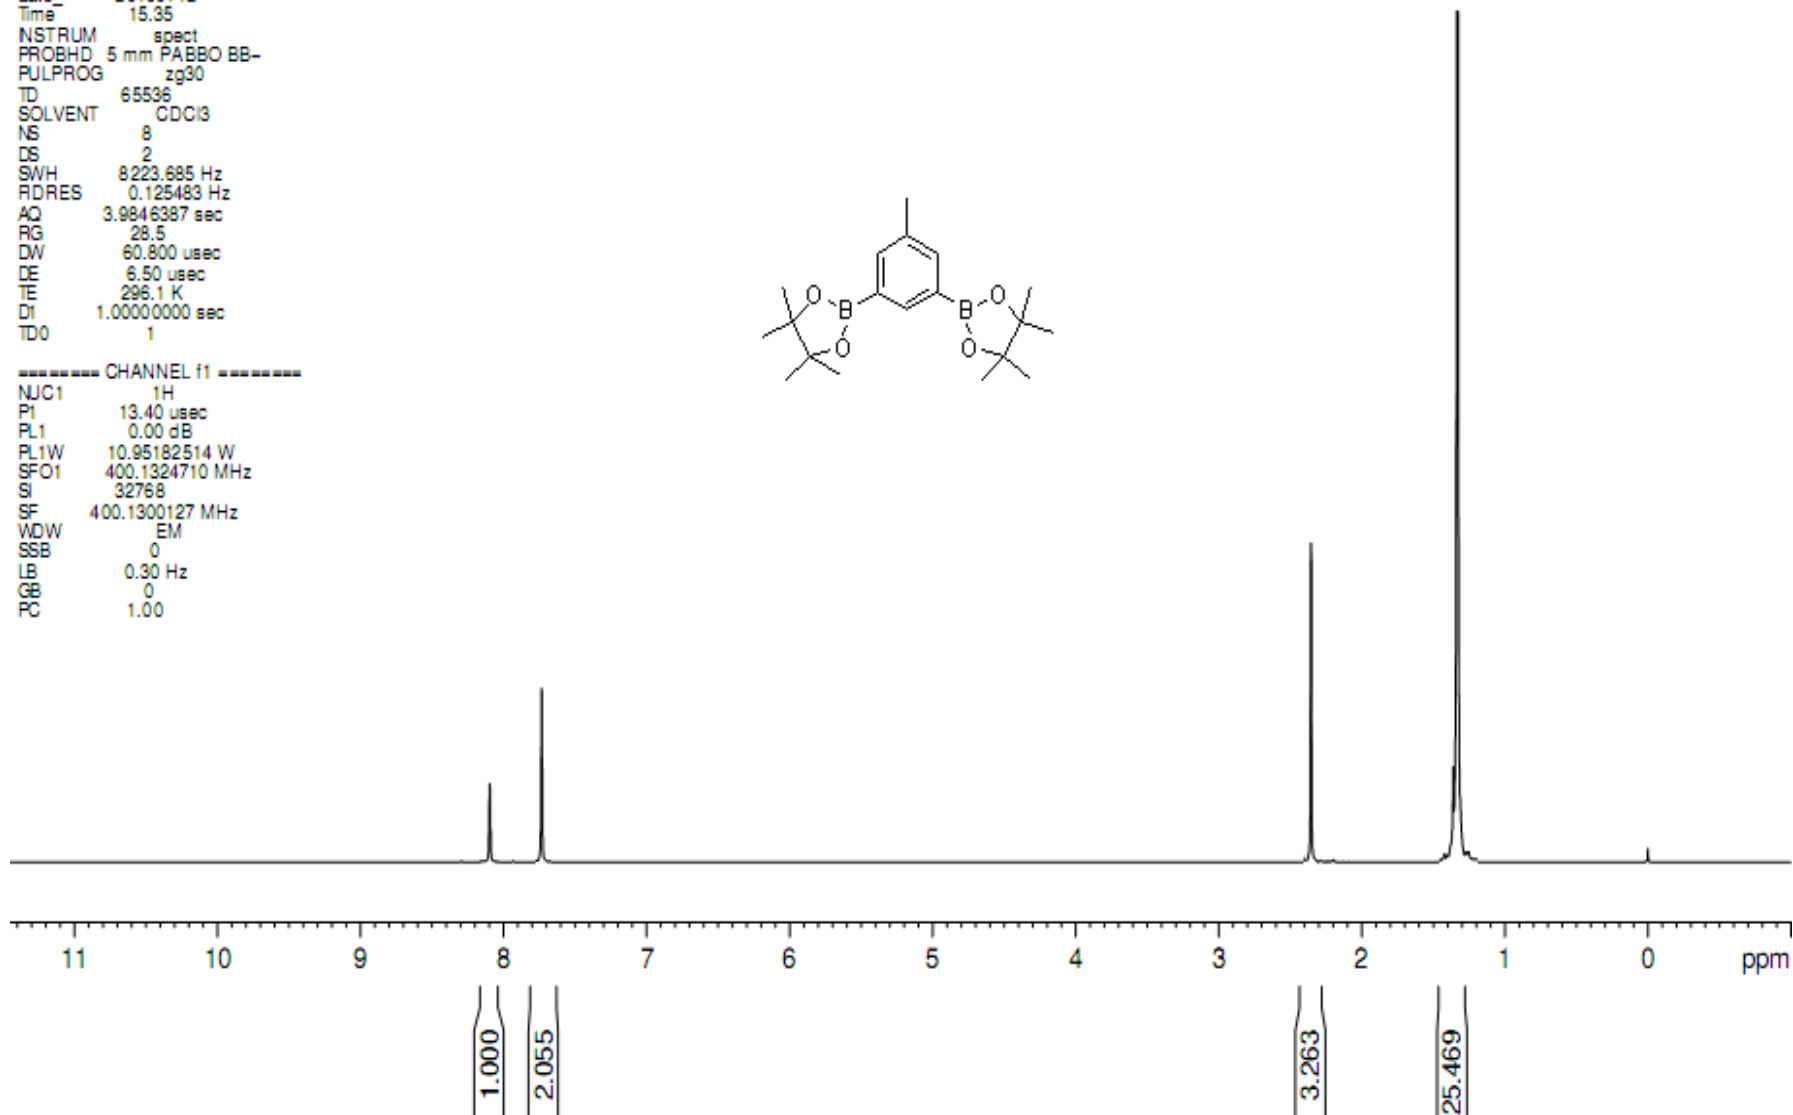

**Fig. S9** 400 MHz  $^1\text{H}$  NMR of 3,5-bis-(4,4,5,5-tetramethyl-1,3,2-dioxaborolane)toluene in  $\text{CDCl}_3$

NAME 0101  
EXPNO 3008  
PROCNO 1  
Date\_ 20100112  
Time 22:18  
INSTRUM spect  
PROBHD 5 mm PABBO BB-  
PULPROG zgpg30  
TD 65535  
SOLVENT CDCl3  
NS 2048  
DS 4  
SWH 24038.461 Hz  
FDRS 0.366798 Hz  
AQ 1.3631968 sec  
RG 32800  
DW 20.800 usec  
DE 6.50 usec  
TE 298.5 K  
D1 2.00000000 sec  
D11 0.09000000 sec  
TDO 1

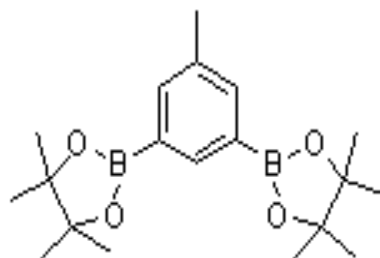

----- CHANNEL f1 -----  
NUC1 13C  
PI 10.00 usec  
PL1 -1.00 dB  
PL1W 48.06661987 W  
SFO1 100.6228298 MHz

----- CHANNEL f2 -----  
CPDPRG2 waltz16  
NUC2 1H  
PCPD2 80.00 usec  
PL2 0.00 dB  
PL12 15.50 dB  
PL13 15.50 dB  
PL2W 10.95182514 W  
PL12W 0.30888435 W  
PL13W 0.30888435 W  
SFO2 400.1316005 MHz  
SI 32768  
SF 100.6127690 MHz  
VDW EM  
SEB 0  
LB 1.00 Hz  
GB 0  
PC 1.40

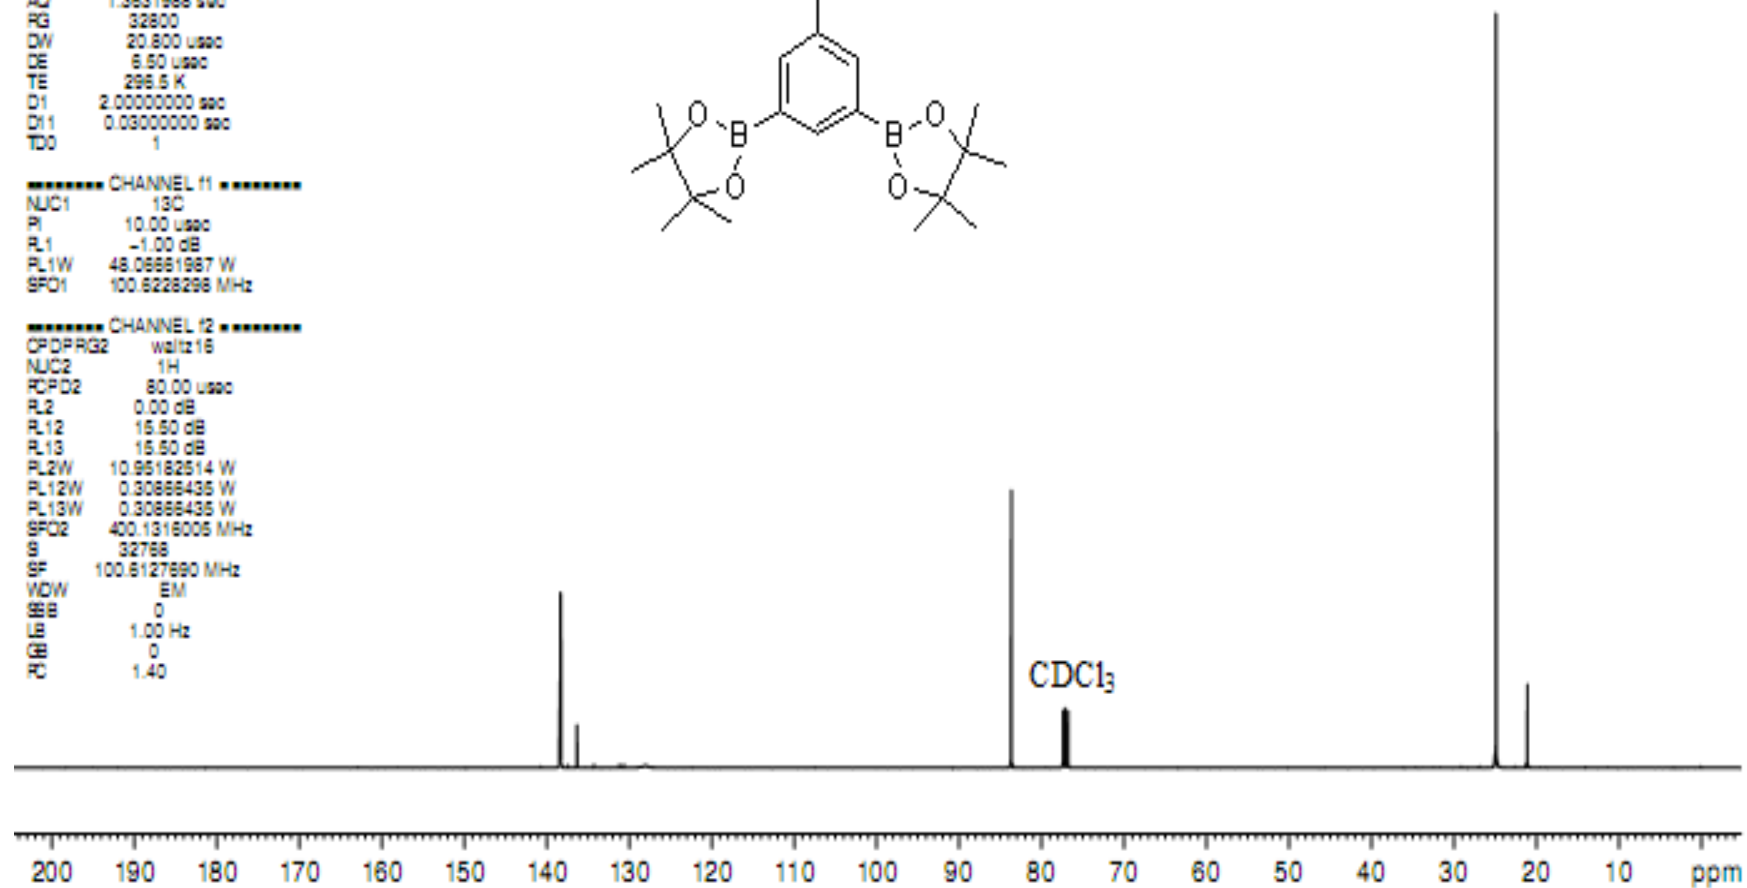

Fig. S10 100 MHz  $^{13}\text{C}$  NMR of 3,5-bis-(4,4,5,5-tetramethyl-1,3,2-dioxaborolane)toluene in  $\text{CD}_3\text{Cl}_3$ .

NAME 1007  
EXPNO 1365  
PROCNO 1  
Date\_ 20100727  
Time\_ 14.35  
INSTRUM spect  
PROBHD 5 mm PABBO BB-  
PULPROG zg30  
TD 65536  
SOLVENT D2O  
NS 8  
DS 2  
SWH 8223.685 Hz  
FIDRES 0.125483 Hz  
AQ 3.9846367 sec  
RG 267  
DNW 60.800 usec  
DE 6.50 usec  
TE 301.2 K  
D1 1.00000000 sec  
TD0 1

----- CHANNEL f1 -----  
NUC1 1H  
P1 13.40 usec  
PL1 0.00 dB  
PL1W 10.95182514 W  
SFO1 400.1324710 MHz  
SI 32768  
SF 400.1300000 MHz  
WDW EM  
SSB 0  
LB 0.30 Hz  
GB 0  
PC 1.00

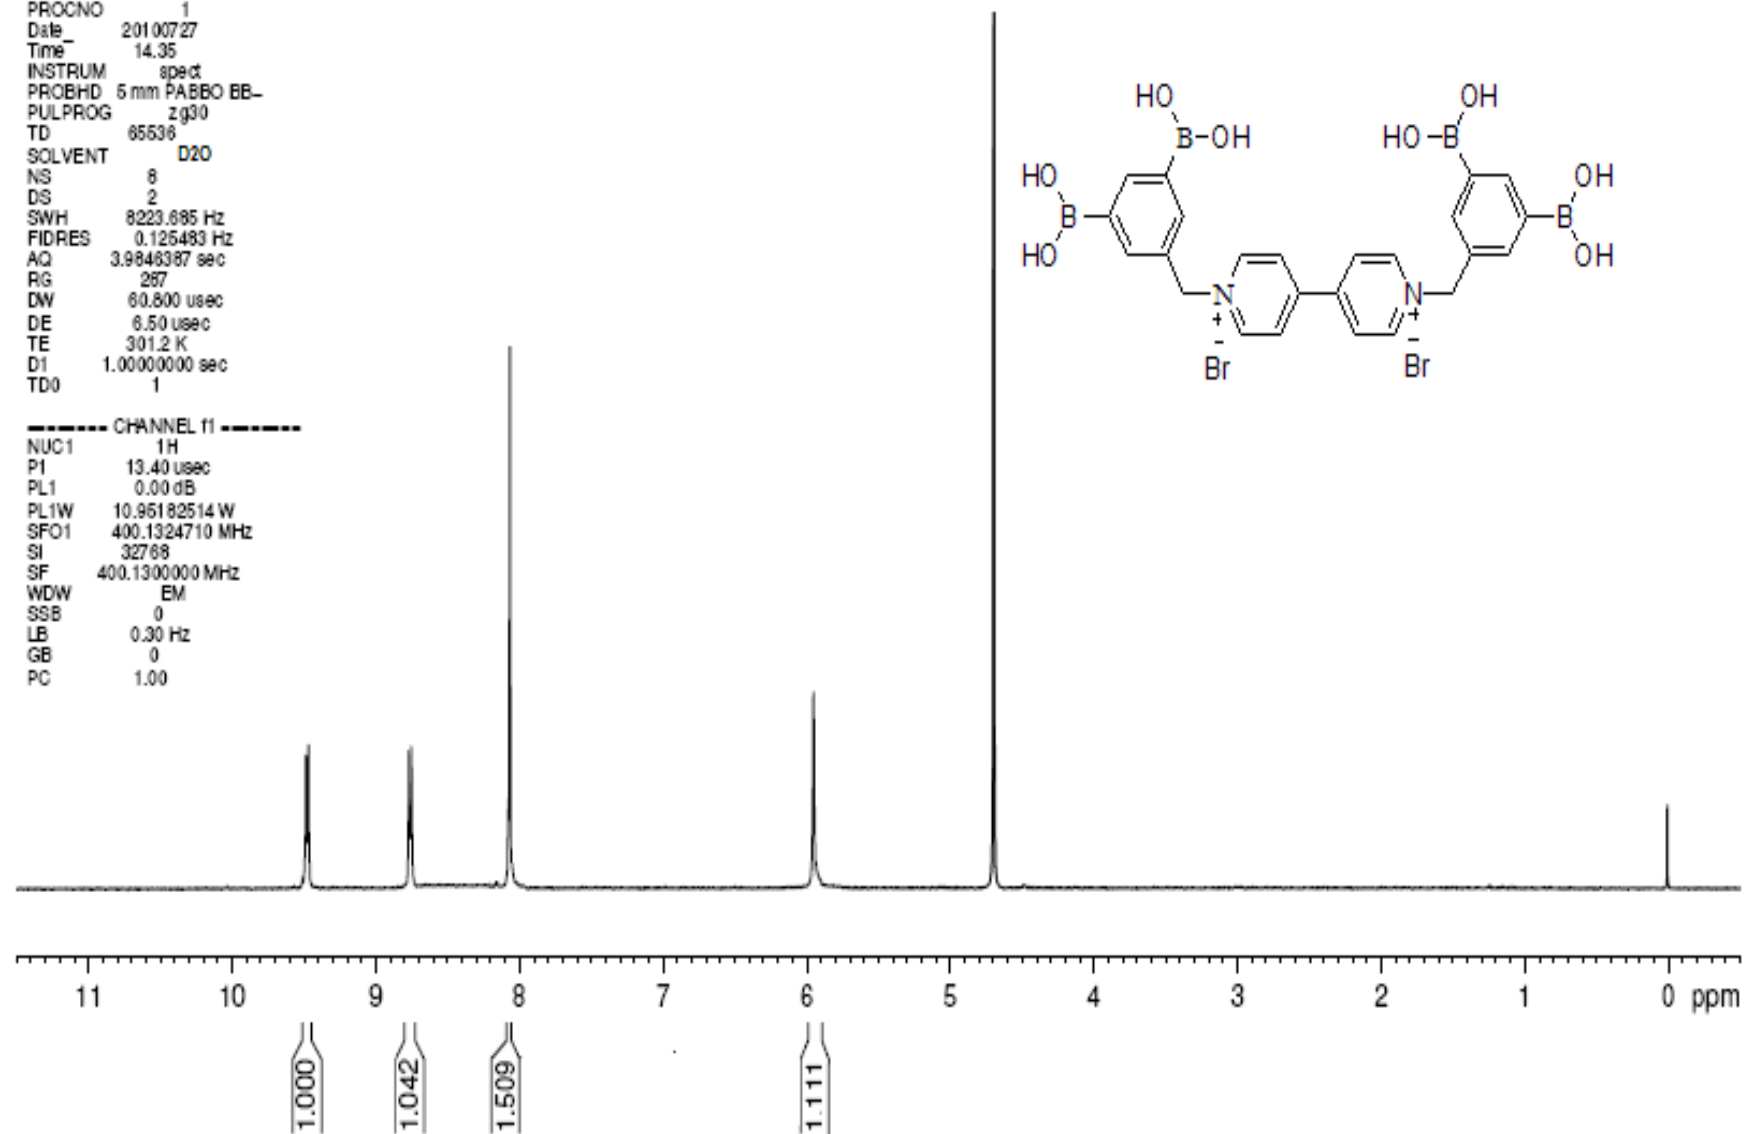

**Fig. S11** 400 MHz <sup>1</sup>H NMR of T<sub>0</sub>BV in D<sub>2</sub>O

NAME 1007  
EXPNO 3014  
PROCNO 1  
Date\_ 20100728  
Time 22.23  
INSTRUM spect  
PROBHD 5 mm PABBO BB-  
PULPROG zgpg30  
TD 65536  
SOLVENT D2O  
NS 4096  
DS 4  
SWH 24038.461 Hz  
FIDRES 0.366798 Hz  
AQ 1.3631988 sec  
RG 32800  
DW 20.800 usec  
DE 6.50 usec  
TE 302.3 K  
D1 2.0000000 sec  
D11 0.0300000 sec  
TD0 1

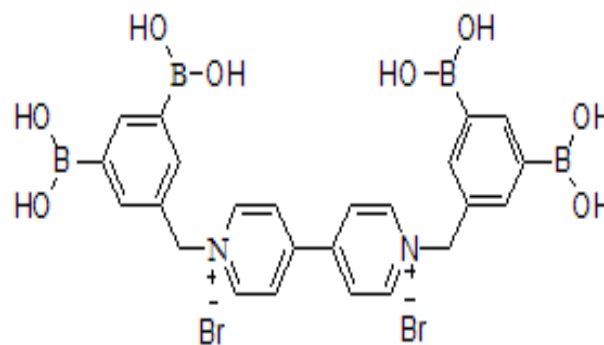

----- CHANNEL f1 -----  
NUC1 13C  
P1 10.00 usec  
PL1 -1.00 dB  
PL1W 48.06661967 W  
SFO1 100.6226298 MHz

----- CHANNEL f2 -----  
CPDPRG2 waltz16  
NUC2 1H  
PCPD2 80.00 usec  
PL2 0.00 dB  
PL12 15.50 dB

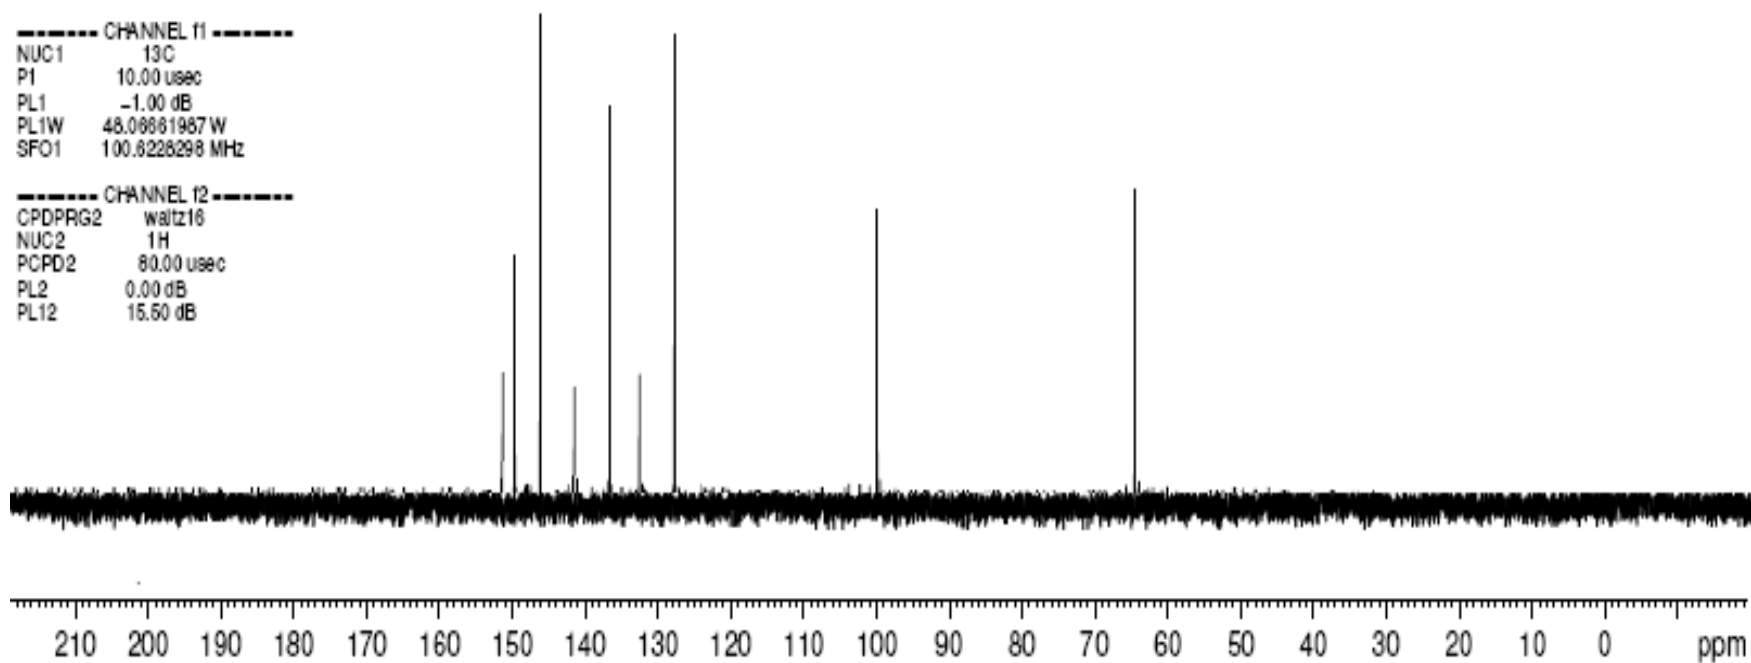

Fig. S12 100 MHz  $^{13}\text{C}$  NMR of ToBV in  $\text{D}_2\text{O}$
